# Supplementary material for: Transcriptome and metabolome analyses reveal the responses of brown planthoppers to RH resistant rice cultivar
Source: Front Physiol. 2022 Sep 16;13:1018470. doi: 10.3389/fphys.2022.1018470 (PMC9523508; doi:10.3389/fphys.2022.1018470)
Supplement: Supplementary file 9 [file Table7.XLSX]

## Sheet: Sheet1
Table S7. The pathways affected by the differentially accumulated metabolites.
Pathway name	Total compound	Hits compound	Raw p	-ln(p)	Impact
Starch and sucrose metabolism	17	4	0.021617	3.8343	0.18692
D-Arginine and D-ornithine metabolism	4	2	0.023715	3.7416	0
Pentose and glucuronate interconversions	14	3	0.059524	2.8214	0
Arginine and proline metabolism	37	5	0.091081	2.396	0.17848
Alanine, aspartate and glutamate metabolism	23	3	0.19053	1.6579	0.3446
Galactose metabolism	26	3	0.24402	1.4105	0.15774
Glycerolipid metabolism	16	2	0.28623	1.2509	0.27443
Biotin metabolism	5	1	0.29025	1.237	0.4
D-Glutamine and D-glutamate metabolism	5	1	0.29025	1.237	1
Linoleic acid metabolism	6	1	0.33743	1.0864	0
Thiamine metabolism	6	1	0.33743	1.0864	0
Ascorbate and aldarate metabolism	6	1	0.33743	1.0864	0.5
Taurine and hypotaurine metabolism	6	1	0.33743	1.0864	0.5
Nitrogen metabolism	7	1	0.38151	0.96361	0
Histidine metabolism	7	1	0.38151	0.96361	1
Butanoate metabolism	21	2	0.41014	0.89127	0.18182
Phenylalanine metabolism	10	1	0.49715	0.69887	0
Glycerophospholipid metabolism	27	2	0.544	0.60881	0.06666
Amino sugar and nucleotide sugar metabolism	34	2	0.67221	0.39719	0.19949
Pentose phosphate pathway	19	1	0.73079	0.31363	0
Pyrimidine metabolism	41	2	0.77014	0.26118	0.00896
Porphyrin and chlorophyll metabolism	23	1	0.79645	0.22759	0
Inositol phosphate metabolism	24	1	0.81022	0.21045	0
Purine metabolism	64	3	0.81315	0.20684	0.02494
Glycolysis or Gluconeogenesis	25	1	0.82308	0.1947	0
Glycine, serine and threonine metabolism	25	1	0.82308	0.1947	0
Cysteine and methionine metabolism	25	1	0.82308	0.1947	0.0234
Glutathione metabolism	26	1	0.83508	0.18023	0.11985
Aminoacyl-tRNA biosynthesis	67	3	0.83757	0.17725	0
Tyrosine metabolism	30	1	0.87556	0.1329	0
Raw p, p value; -ln(p), negative natural logarithm of the p-value.
